# Supplementary material for: Gene expression profiling of Group 3 medulloblastomas defines a clinically tractable stratification based on KIRREL2 expression
Source: PubMed Central journal article supplement (PMC9288368; doi:10.1007/s00401-022-02460-1), 2022-06-30
Supplement: 401_2022_2460_MOESM1_ESM.pdf [file 401_2022_2460_MOESM1_ESM.pdf]

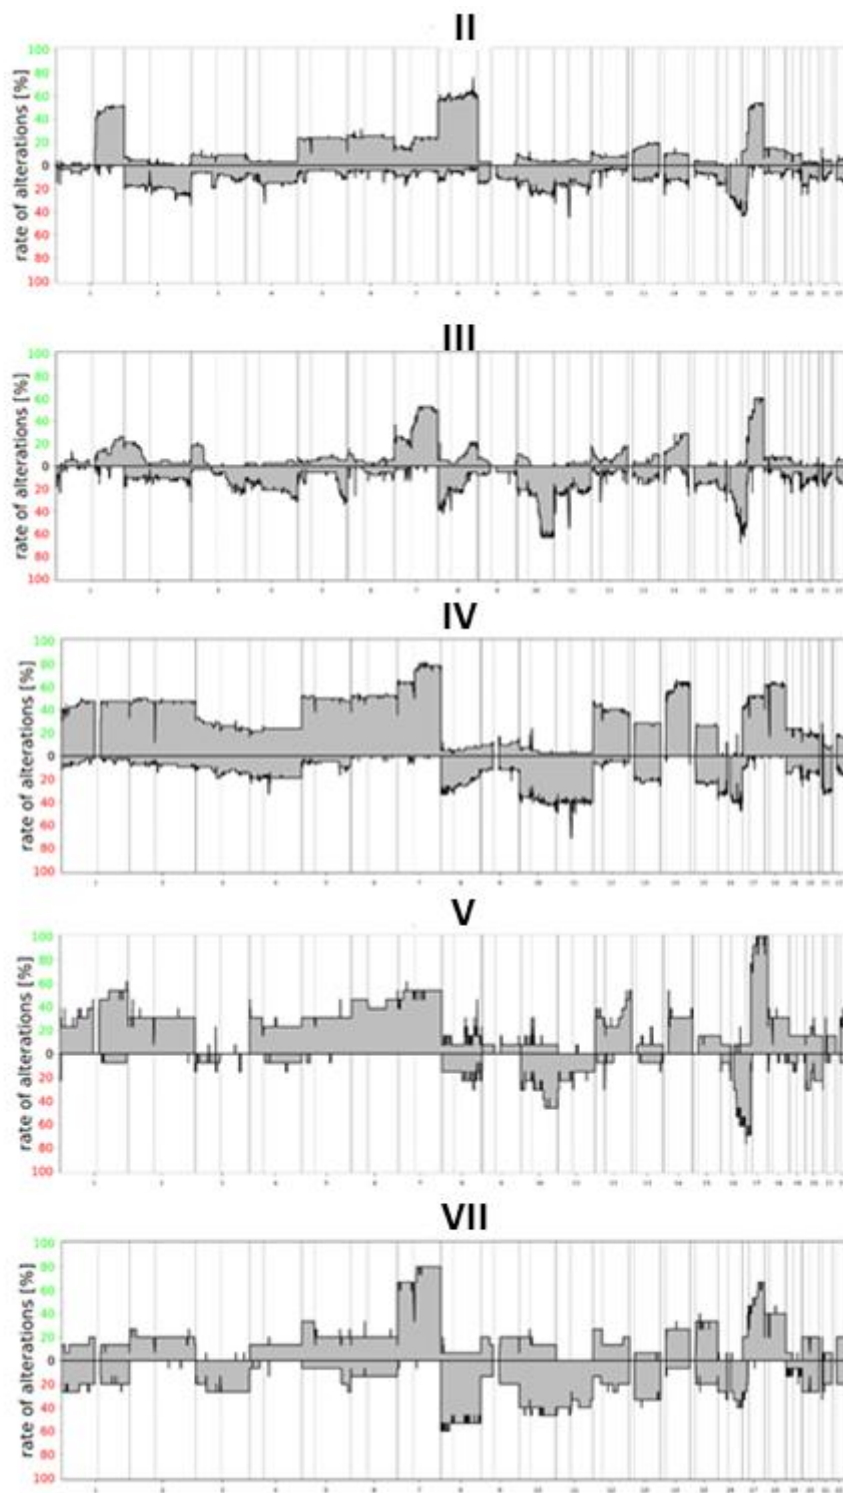

**Supplementary Figure 1.** CNVs profiles generated for various second-generation subgroups identified within Grp 3 MB.

**a.**

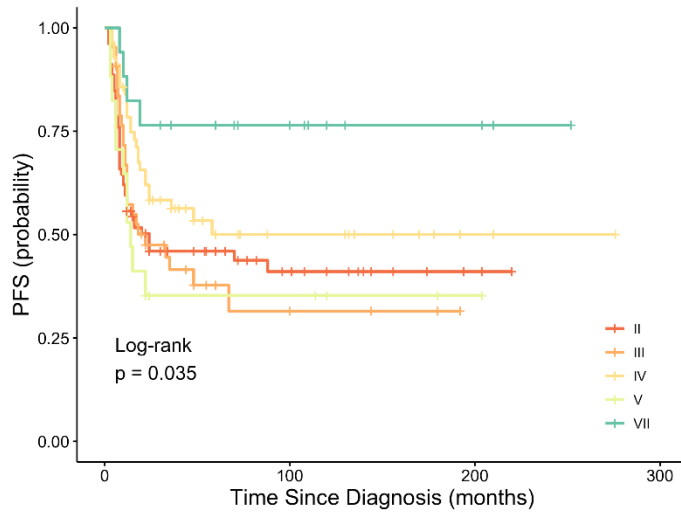

No. at Risk (# events)

|        |         |        |        |
|--------|---------|--------|--------|
| 79 (0) | 14 (44) | 4 (44) | 0 (44) |
| 43 (0) | 5 (26)  | 0 (26) | 0 (26) |
| 56 (0) | 9 (26)  | 2 (26) | 0 (26) |
| 17 (0) | 4 (11)  | 1 (11) | 0 (11) |
| 17 (0) | 8 (4)   | 3 (4)  | 0 (4)  |

**b.**

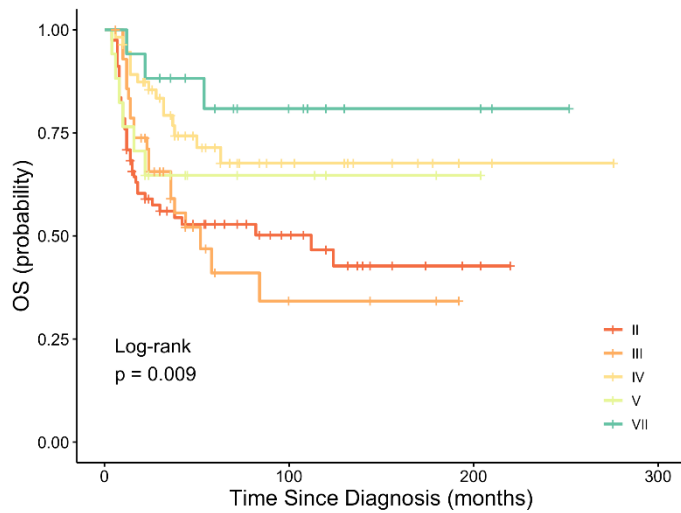

No. at Risk (# events)

|        |         |        |        |
|--------|---------|--------|--------|
| 79 (0) | 16 (37) | 4 (39) | 0 (39) |
| 43 (0) | 5 (21)  | 0 (21) | 0 (21) |
| 56 (0) | 10 (15) | 2 (15) | 0 (15) |
| 17 (0) | 4 (6)   | 1 (6)  | 0 (6)  |
| 17 (0) | 8 (3)   | 3 (3)  | 0 (3)  |

**Supplementary Figure 2.** Survival analysis by Kaplan-Meier plotted of second-generation Grp 3 MB subgroups. Thus, subgroups IV and VII revealed significantly better PFS (**a**) and OS (**b**) as compared to subgroups II, III and V.

**Supplementary Table 1. List of genes differentially expressed in Group 3 MB with various outcomes**

| <b>Gene</b>       | <b>LogFC</b> | <b>AveExpr</b> | <b>P.Value</b> | <b>Adj.P.Val</b> |
|-------------------|--------------|----------------|----------------|------------------|
| <i>MYC</i>        | 1,795375932  | 3,967585111    | 1,19E-07       | 0,001507289      |
| <i>KIRREL2</i>    | 0,911975267  | 2,020354754    | 1,47E-07       | 0,001507289      |
| <i>ITPRIPL1</i>   | 0,641901572  | 1,467529031    | 1,88E-07       | 0,001507289      |
| <i>DCAF4</i>      | 0,558717404  | 1,886352803    | 1,98E-07       | 0,001507289      |
| <i>NPW</i>        | 0,696787869  | 0,653871128    | 2,41E-07       | 0,001507289      |
| <i>CDT1</i>       | 0,71536121   | 2,246769615    | 4,56E-07       | 0,002172801      |
| <i>MAB21L2</i>    | 0,847060421  | 2,496060429    | 5,63E-07       | 0,002172801      |
| <i>MTHFD2</i>     | 1,542401705  | 2,398412223    | 6,70E-07       | 0,002172801      |
| <i>SNORD115-5</i> | -2,374098718 | 5,391567474    | 6,10E-07       | 0,002172801      |
| <i>HSPA1B</i>     | 1,082960737  | 4,824562514    | 7,53E-07       | 0,002172801      |
| <i>FASN</i>       | 0,754443495  | 5,734571765    | 1,04E-06       | 0,002579872      |
| <i>SLC6A1</i>     | -0,744523062 | 1,752718032    | 1,07E-06       | 0,002579872      |
| <i>ACLY</i>       | 0,544686769  | 6,447560471    | 1,20E-06       | 0,002677319      |
| <i>NCAPH</i>      | 0,693616351  | 3,098267669    | 1,30E-06       | 0,002717763      |
| <i>FEN1</i>       | 0,510208962  | 2,852451586    | 1,78E-06       | 0,003491137      |
| <i>MRPS34</i>     | 0,611738991  | 3,127763181    | 2,08E-06       | 0,003831095      |
| <i>HIST2H3D</i>   | 1,090477366  | 4,961890544    | 2,82E-06       | 0,004901278      |
| <i>PITPNA</i>     | -0,622982799 | 3,699098597    | 3,22E-06       | 0,005041655      |
| <i>DCTPP1</i>     | 0,706421026  | 2,537760795    | 3,44E-06       | 0,005102363      |
| <i>AC010761.8</i> | 0,535137962  | 1,198695107    | 3,59E-06       | 0,005102363      |
| <i>RANBP3L</i>    | -0,656321708 | 1,361888464    | 4,68E-06       | 0,005978534      |
| <i>MCM10</i>      | 0,640108235  | 2,478406241    | 4,91E-06       | 0,005978534      |
| <i>NTN3</i>       | 0,537356585  | 1,787392141    | 5,15E-06       | 0,005978534      |
| <i>NME1</i>       | 0,622855031  | 2,630868396    | 7,43E-06       | 0,007878407      |
| <i>BZW2</i>       | 0,695208048  | 3,541562756    | 7,58E-06       | 0,007878407      |
| <i>HMGA1</i>      | 0,946584567  | 5,648547405    | 7,80E-06       | 0,007878407      |
| <i>RAN</i>        | 0,555291569  | 4,113900154    | 8,40E-06       | 0,008222257      |
| <i>LRP1</i>       | -0,61347828  | 4,024855163    | 9,17E-06       | 0,008553208      |
| <i>ANKRD44</i>    | -0,607327808 | 2,225257375    | 9,33E-06       | 0,008553208      |
| <i>TMEM97</i>     | 0,726851835  | 3,085900681    | 9,56E-06       | 0,008553208      |
| <i>TP11P1</i>     | 0,604043603  | 2,239460997    | 1,17E-05       | 0,009228367      |
| <i>SPOCK2</i>     | -0,71206269  | 1,658269843    | 1,23E-05       | 0,009228367      |
| <i>FDFT1</i>      | 0,73846908   | 3,274396508    | 1,25E-05       | 0,009228367      |
| <i>ENO1</i>       | 0,654367469  | 6,523342646    | 1,27E-05       | 0,009228367      |
| <i>SIGMAR1</i>    | 0,63258282   | 3,343658305    | 1,28E-05       | 0,009228367      |
| <i>SREBF2</i>     | 0,520085427  | 5,423307501    | 1,31E-05       | 0,009228367      |
| <i>PHACTR2</i>    | -0,746389549 | 2,379044022    | 1,32E-05       | 0,009228367      |
| <i>RCC1</i>       | 0,657394187  | 2,836325852    | 1,39E-05       | 0,009246808      |
| <i>SLC25A39</i>   | 0,570390564  | 3,844715914    | 1,53E-05       | 0,009317924      |
| <i>DHCR7</i>      | 0,518034466  | 1,801278613    | 1,55E-05       | 0,009317924      |
| <i>WDR96</i>      | -0,663398792 | 1,672016852    | 1,85E-05       | 0,01034211       |
| <i>FADS1</i>      | 0,504890837  | 2,546491966    | 1,88E-05       | 0,010343897      |
| <i>DHCR24</i>     | 0,76634286   | 2,533445429    | 1,98E-05       | 0,01048287       |
| <i>RCOR2</i>      | 0,801461828  | 5,159107135    | 2,01E-05       | 0,01048287       |
| <i>APCDD1</i>     | -0,992845418 | 2,645321537    | 2,09E-05       | 0,010547575      |
| <i>YBX1P10</i>    | 0,56723935   | 1,692335196    | 2,09E-05       | 0,010547575      |
| <i>HIST2H2BF</i>  | 0,843641944  | 6,578715975    | 2,18E-05       | 0,01062099       |
| <i>LDHB</i>       | 1,074336481  | 6,394907417    | 2,20E-05       | 0,01062099       |
| <i>LRRC37A3</i>   | -0,705398413 | 4,101771569    | 2,21E-05       | 0,01062099       |
| <i>NTM</i>        | -0,585955903 | 1,529352643    | 2,27E-05       | 0,01062099       |
| <i>PYCR1</i>      | 0,696682131  | 3,770108499    | 2,50E-05       | 0,011365902      |
| <i>ATP1A2</i>     | -0,935020776 | 3,376236285    | 2,78E-05       | 0,011939696      |
| <i>RPL18AP3</i>   | 0,754198295  | 2,160977885    | 2,80E-05       | 0,011939696      |
| <i>EIF4B</i>      | 0,664538124  | 5,024484836    | 2,82E-05       | 0,011939696      |
| <i>PLAGL1</i>     | -0,794529272 | 2,008085819    | 2,95E-05       | 0,012143417      |
| <i>SQLE</i>       | 0,66981635   | 3,254327771    | 3,27E-05       | 0,013313053      |
| <i>TKT</i>        | 0,684487834  | 3,316429203    | 3,32E-05       | 0,013318888      |

|                       |              |             |             |             |
|-----------------------|--------------|-------------|-------------|-------------|
| <b>RPL14P1</b>        | 0,730445106  | 3,275393153 | 3,45E-05    | 0,013320995 |
| <b>HIST3H2BA</b>      | 0,975688976  | 1,783515769 | 3,70E-05    | 0,013320995 |
| <b>HIST1H1B</b>       | 0,939310825  | 6,378838108 | 3,76E-05    | 0,013320995 |
| <b>PAICS</b>          | 0,739889707  | 3,973335011 | 4,05E-05    | 0,01376999  |
| <b>CPNE4</b>          | -0,976834599 | 2,565316509 | 4,18E-05    | 0,013896114 |
| <b>EPB41L1</b>        | -0,623552427 | 4,132323002 | 4,22E-05    | 0,013896114 |
| <b>NOB1</b>           | 0,650269708  | 3,106466429 | 4,37E-05    | 0,014130083 |
| <b>BOP1</b>           | 0,643004714  | 2,694499511 | 4,38E-05    | 0,014130083 |
| <b>REC8</b>           | 0,646034834  | 4,296555839 | 4,42E-05    | 0,014130083 |
| <b>EIF4BP3</b>        | 0,551645751  | 2,024571211 | 4,63E-05    | 0,014637247 |
| <b>DKK3</b>           | -0,638975292 | 1,745512451 | 4,87E-05    | 0,014966716 |
| <b>RNASEH2A</b>       | 0,575546553  | 4,654505493 | 4,92E-05    | 0,014966716 |
| <b>HSPE1</b>          | 0,582423925  | 2,355679864 | 5,06E-05    | 0,015244515 |
| <b>ETV5</b>           | -0,623668727 | 1,516683351 | 5,37E-05    | 0,015862279 |
| <b>RP11-1336O20.2</b> | 0,74609934   | 1,456489731 | 5,64E-05    | 0,016491688 |
| <b>AHCY</b>           | 0,679771594  | 3,825068748 | 6,11E-05    | 0,016898981 |
| <b>CCT3</b>           | 0,608155497  | 5,525056552 | 6,16E-05    | 0,016898981 |
| <b>RCBTB2</b>         | -0,553364784 | 2,410171575 | 6,19E-05    | 0,016898981 |
| <b>PBK</b>            | 0,731782949  | 2,997145484 | 6,20E-05    | 0,016898981 |
| <b>SNHG16*</b>        | 0,635674653  | 2,417035864 | 6,29E-05    | 0,016898981 |
| <b>PTMAP2</b>         | 0,613878254  | 4,250471832 | 6,33E-05    | 0,016898981 |
| <b>NTRK2</b>          | -0,690756822 | 2,158331113 | 6,37E-05    | 0,016898981 |
| <b>ALYREF</b>         | 0,501607515  | 3,481857694 | 6,46E-05    | 0,01691754  |
| <b>SNRPB</b>          | 0,501664075  | 3,124999623 | 6,48E-05    | 0,01691754  |
| <b>COCH</b>           | 0,587378006  | 2,963221115 | 6,76E-05    | 0,0173455   |
| <b>IL6ST</b>          | -0,502300923 | 3,110265139 | 7,09E-05    | 0,017832236 |
| <b>CCDC136</b>        | -0,842361467 | 2,252735262 | 7,11E-05    | 0,017832236 |
| <b>LINGO2</b>         | -0,741213502 | 1,825686474 | 7,32E-05    | 0,018054682 |
| <b>SNORD115-21</b>    | -1,696587842 | 3,453661881 | 7,43E-05    | 0,018165635 |
| <b>RPS7P1</b>         | 0,839963334  | 3,652857503 | 7,68E-05    | 0,018332598 |
| <b>PCDHGC3</b>        | -0,551833565 | 3,359372372 | 7,69E-05    | 0,018332598 |
| <b>MRPL54</b>         | 0,502293397  | 2,918425269 | 7,73E-05    | 0,018332598 |
| <b>RPS3</b>           | 0,804522168  | 5,669797674 | 8,17E-05    | 0,018944263 |
| <b>HSPD1</b>          | 0,703047993  | 6,547429872 | 8,31E-05    | 0,018969122 |
| <b>ORC6</b>           | 0,544834692  | 2,770055586 | 8,37E-05    | 0,018969122 |
| <b>ZNF117</b>         | -0,761554566 | 4,431085274 | 8,54E-05    | 0,018969122 |
| <b>CDCA8</b>          | 0,567786994  | 3,280068677 | 8,66E-05    | 0,019101298 |
| <b>BBS9</b>           | -0,617256196 | 4,542252814 | 9,05E-05    | 0,019541663 |
| <b>PA2G4</b>          | 0,531295916  | 4,437676428 | 9,21E-05    | 0,019609178 |
| <b>MIR340</b>         | -0,95776427  | 3,014245132 | 9,47E-05    | 0,019915713 |
| <b>EIF4BP7</b>        | 0,505384916  | 1,366084785 | 9,48E-05    | 0,019915713 |
| <b>PHB</b>            | 0,556984895  | 3,644697472 | 9,77E-05    | 0,020080203 |
| <b>TACC3</b>          | 0,503172676  | 2,603033126 | 9,90E-05    | 0,020080203 |
| <b>RPS16</b>          | 0,726511732  | 5,823448051 | 0,000100236 | 0,020080203 |
| <b>UTRN</b>           | -0,709029932 | 3,210482433 | 0,00010039  | 0,020080203 |
| <b>FAM71F2</b>        | -0,566695447 | 1,951700902 | 0,000101268 | 0,020080203 |
| <b>RSL24D1</b>        | 0,566948331  | 4,182940346 | 0,000107311 | 0,020740754 |
| <b>PODN</b>           | -0,637835965 | 1,493996564 | 0,000108814 | 0,020902306 |
| <b>NDRG2</b>          | -0,511920773 | 2,656671134 | 0,000111959 | 0,021112191 |
| <b>LHX3</b>           | 0,546550796  | 0,592441147 | 0,000112265 | 0,021112191 |
| <b>RPS2P5</b>         | 0,728061776  | 1,900284377 | 0,000114482 | 0,021112191 |
| <b>SLC27A2</b>        | 0,513358613  | 0,958723252 | 0,000115049 | 0,021112191 |
| <b>ZBTB38</b>         | -0,50691445  | 2,098802813 | 0,000115301 | 0,021112191 |
| <b>DDX21</b>          | 0,517881759  | 4,408650044 | 0,000121894 | 0,021630497 |
| <b>FBL</b>            | 0,707980485  | 5,167344558 | 0,000122276 | 0,021630497 |
| <b>HIST1H1E</b>       | 0,632204907  | 7,655891153 | 0,000124686 | 0,02168912  |
| <b>PFKM</b>           | 0,55204908   | 5,001505548 | 0,000127771 | 0,022065393 |
| <b>AURKA</b>          | 0,608879492  | 3,591458483 | 0,000128258 | 0,022065393 |
| <b>UTP18</b>          | 0,506268847  | 4,312547466 | 0,000135855 | 0,023045778 |
| <b>SORBS1</b>         | -0,537445857 | 1,655010195 | 0,000139213 | 0,023403294 |
| <b>GSG1</b>           | 0,948010142  | 2,285424281 | 0,000147094 | 0,024055752 |

|                      |              |             |             |             |
|----------------------|--------------|-------------|-------------|-------------|
| <i>HIST1H2BO</i>     | 0,986589914  | 7,100108763 | 0,000151777 | 0,024565477 |
| <i>RPL18A</i>        | 0,757761486  | 4,708826535 | 0,000153448 | 0,024565477 |
| <i>JPH1</i>          | 0,54146761   | 1,229320976 | 0,000153775 | 0,024565477 |
| <i>RRP9</i>          | 0,534449378  | 4,175097854 | 0,000161682 | 0,025567873 |
| <i>RRM2</i>          | 0,541194166  | 3,246647218 | 0,000166389 | 0,026049067 |
| <i>PTPRO</i>         | -0,912701336 | 5,680629162 | 0,000168624 | 0,026108601 |
| <i>APRT</i>          | 0,704849851  | 3,136610318 | 0,000169723 | 0,026108601 |
| <i>AC005154.7</i>    | -0,667843988 | 4,185696329 | 0,000170939 | 0,026108601 |
| <i>EIF4BP6</i>       | 0,601797431  | 2,081671765 | 0,00017339  | 0,026253095 |
| <i>PGK1</i>          | 0,515751649  | 5,260276204 | 0,000173562 | 0,026253095 |
| <i>ZNF239</i>        | 0,504497162  | 2,202112681 | 0,000175354 | 0,026396719 |
| <i>FAM86A</i>        | 0,506148535  | 3,216052071 | 0,000187958 | 0,027582048 |
| <i>PCDHB17</i>       | -0,797645764 | 2,995132353 | 0,000189395 | 0,027582048 |
| <i>CKS2</i>          | 0,672357374  | 4,084831547 | 0,000193348 | 0,028027389 |
| <i>KCNK1</i>         | -0,583466851 | 1,106207291 | 0,000194696 | 0,028038717 |
| <i>RAC3</i>          | 0,593593587  | 3,180883697 | 0,000200399 | 0,028534569 |
| <i>CCDC88C</i>       | 0,550168438  | 3,395866778 | 0,000200492 | 0,028534569 |
| <i>RPL4</i>          | 0,73376242   | 7,321556111 | 0,000209197 | 0,029638718 |
| <i>TAF4B</i>         | 0,536115673  | 2,543432069 | 0,000211158 | 0,029781821 |
| <i>LEPR</i>          | -0,500848994 | 2,227670564 | 0,000214808 | 0,03007523  |
| <i>PPIAP22</i>       | 0,630204452  | 4,503696661 | 0,000226872 | 0,030351354 |
| <i>SNORD115-25</i>   | -1,628107851 | 3,637888111 | 0,000235352 | 0,031225003 |
| <i>TRPM3</i>         | -1,015883873 | 2,432296888 | 0,000238129 | 0,031460103 |
| <i>RP11-466H18.1</i> | 0,851908905  | 4,419660486 | 0,000239319 | 0,031484518 |
| <i>RPL4P5</i>        | 0,522199345  | 1,464780221 | 0,000246841 | 0,031746546 |
| <i>RPL5</i>          | 0,627012814  | 7,892681814 | 0,000250937 | 0,031746546 |
| <i>RPL13AP5</i>      | 0,734695695  | 5,106003317 | 0,000253698 | 0,031746546 |
| <i>UBE2S</i>         | 0,596403977  | 4,204969362 | 0,000258074 | 0,031746546 |
| <i>ANKS1B</i>        | -0,778565014 | 3,363307617 | 0,000261148 | 0,031746546 |
| <i>RFTN1</i>         | -0,523184396 | 2,450801558 | 0,0002621   | 0,031746546 |
| <i>RPL13</i>         | 0,749439774  | 4,678830511 | 0,000262667 | 0,031746546 |
| <i>RASGEF1C</i>      | -0,537843889 | 1,553381543 | 0,000267183 | 0,031746546 |
| <i>EIF4EBP1</i>      | 0,734141797  | 3,048388574 | 0,000267935 | 0,031746546 |
| <i>SLC6A15</i>       | 0,721726862  | 1,894772997 | 0,000268756 | 0,031746546 |
| <i>PRMT1</i>         | 0,510353159  | 4,935223505 | 0,000269068 | 0,031746546 |
| <i>IMPDH2</i>        | 0,656274514  | 5,989019133 | 0,000270714 | 0,031746546 |
| <i>MRPL15</i>        | 0,549429797  | 3,735949917 | 0,000273709 | 0,031972695 |
| <i>HES6</i>          | 0,839139797  | 5,153642061 | 0,000276816 | 0,031972695 |
| <i>SPINK9</i>        | -0,588101194 | 2,037750927 | 0,00028044  | 0,032076402 |
| <i>MEIS3P1</i>       | -0,601169357 | 2,078587489 | 0,000288004 | 0,032408214 |
| <i>LGI1</i>          | -0,970251026 | 2,589041539 | 0,000313133 | 0,034179118 |
| <i>ATP8A2</i>        | -0,85780488  | 2,139435052 | 0,000313289 | 0,034179118 |
| <i>CPNE7</i>         | 0,976334544  | 1,421700095 | 0,000324026 | 0,03427557  |
| <i>CTTNBP2</i>       | -1,173946787 | 2,533247686 | 0,000327484 | 0,034414702 |
| <i>PCDHGA2</i>       | -0,804419984 | 3,193245954 | 0,000327539 | 0,034414702 |
| <i>ELMO1</i>         | -0,545571185 | 1,887078981 | 0,000333322 | 0,034788866 |
| <i>CDC20</i>         | 0,61780642   | 3,584806431 | 0,00033771  | 0,035013354 |
| <i>SERPING1</i>      | -0,696899702 | 4,207702621 | 0,000349098 | 0,035720958 |
| <i>CACNA2D2</i>      | -0,611474371 | 2,774495971 | 0,000353505 | 0,036054052 |
| <i>RPS7</i>          | 0,670377632  | 6,788130393 | 0,000359165 | 0,036452636 |
| <i>KCNA1</i>         | -0,670983756 | 0,877773405 | 0,000359741 | 0,036452636 |
| <i>FGFR1</i>         | -0,696608667 | 2,787342418 | 0,00036272  | 0,03646359  |
| <i>PCDHB13</i>       | -0,723010499 | 5,069424446 | 0,000363343 | 0,03646359  |
| <i>LOXL4</i>         | 0,733728562  | 2,378020564 | 0,000369009 | 0,036613927 |
| <i>PRDX4</i>         | 0,628507408  | 3,713535687 | 0,000369519 | 0,036613927 |
| <i>CGNL1</i>         | -0,596742246 | 2,029107687 | 0,000372356 | 0,036778665 |
| <i>BCAT1</i>         | 0,614173026  | 1,311621248 | 0,000390197 | 0,038060638 |
| <i>PBX3</i>          | 0,648526039  | 1,762297792 | 0,000395233 | 0,038194898 |
| <i>HIST1H3D</i>      | 0,77599335   | 6,914507655 | 0,00039807  | 0,038350678 |
| <i>RPL4P4</i>        | 0,502451161  | 3,413852387 | 0,000402293 | 0,038520507 |
| <i>HIST1H2AI</i>     | 0,932457427  | 6,117242204 | 0,000406564 | 0,038532979 |

|                     |              |             |             |             |
|---------------------|--------------|-------------|-------------|-------------|
| <b>RPS3A</b>        | 0,711090472  | 5,881429794 | 0,000406765 | 0,038532979 |
| <b>KPNA2</b>        | 0,529787089  | 5,293714323 | 0,000411652 | 0,038617231 |
| <b>MST4</b>         | 0,555110863  | 1,131396857 | 0,000425666 | 0,039085085 |
| <b>GRIN2B</b>       | -0,571601236 | 1,808226109 | 0,000431567 | 0,039265236 |
| <b>NLGN2</b>        | -0,500785089 | 3,268523219 | 0,000433898 | 0,039265236 |
| <b>RP11-234A1.1</b> | 0,561812585  | 4,852541494 | 0,000441294 | 0,03959127  |
| <b>CMSS1</b>        | 0,527504638  | 3,647026475 | 0,000445635 | 0,039788135 |
| <b>SLC44A2</b>      | -0,595197941 | 4,856977021 | 0,000453243 | 0,040088922 |
| <b>RPL14</b>        | 0,645573962  | 7,384321078 | 0,000459703 | 0,040318639 |
| <b>KLHL5</b>        | -0,570420809 | 2,565711911 | 0,000462965 | 0,040491359 |
| <b>MYBL2</b>        | 0,614925851  | 3,508511792 | 0,000471231 | 0,040985289 |
| <b>FNDC4</b>        | -0,549600297 | 1,856534617 | 0,000478929 | 0,041424685 |
| <b>EML4</b>         | 0,526968691  | 4,566858534 | 0,000485739 | 0,041732818 |
| <b>LDHA</b>         | 0,535352247  | 6,556796481 | 0,000489042 | 0,041837179 |
| <b>UBE2C</b>        | 0,589927351  | 3,821154169 | 0,000491352 | 0,041920234 |
| <b>KIAA1199</b>     | -0,639683175 | 3,697826466 | 0,000497582 | 0,042115037 |
| <b>HIST1H2BD</b>    | 0,546236369  | 8,322979404 | 0,000500049 | 0,042115037 |
| <b>PLXNA2</b>       | -0,930885584 | 3,547152141 | 0,000502156 | 0,042115037 |
| <b>SMS</b>          | 0,578768652  | 5,985995332 | 0,000512682 | 0,042595958 |
| <b>NPS</b>          | 0,918584845  | 1,290137111 | 0,000513767 | 0,042595958 |
| <b>SNRPE</b>        | 0,538832346  | 4,353132302 | 0,000524067 | 0,0431254   |
| <b>PPA1</b>         | 0,67742783   | 4,573347059 | 0,000524761 | 0,0431254   |
| <b>HIST1H1C</b>     | 0,596410028  | 7,806687838 | 0,000534628 | 0,04347985  |
| <b>RPL29</b>        | 0,742631743  | 4,930709552 | 0,000538369 | 0,043613493 |
| <b>PDIA5</b>        | 0,596627107  | 3,757636491 | 0,00054045  | 0,043613493 |
| <b>CCT4</b>         | 0,522203582  | 5,573027698 | 0,000548785 | 0,044172234 |
| <b>RPL3P4</b>       | 0,572052963  | 3,741810172 | 0,000556126 | 0,044509237 |
| <b>HIST1H2AG</b>    | 0,775833493  | 6,040397302 | 0,000559558 | 0,044580975 |
| <b>HIST2H2AC</b>    | 0,588552608  | 7,746828137 | 0,000561513 | 0,044623205 |
| <b>TOP1MT</b>       | 0,540523214  | 1,516957845 | 0,000571543 | 0,044787608 |
| <b>PARM1</b>        | -0,531848388 | 1,832310223 | 0,000577866 | 0,045121138 |
| <b>SERPINB6</b>     | -0,516593396 | 3,497217674 | 0,000587031 | 0,045340792 |
| <b>PTGDS</b>        | -0,654121779 | 1,762272611 | 0,000589514 | 0,045340792 |
| <b>SCD</b>          | 0,614141876  | 3,024189175 | 0,00059084  | 0,045340792 |
| <b>RPS15A</b>       | 0,65898658   | 4,609055778 | 0,000591534 | 0,045340792 |
| <b>RPS3AP6</b>      | 0,630615613  | 2,830212464 | 0,000598731 | 0,045612784 |
| <b>ADAMTS7</b>      | -0,611580239 | 1,787999121 | 0,000605784 | 0,04603809  |
| <b>RPSAP58</b>      | 0,534549976  | 2,413219677 | 0,00061238  | 0,046327403 |
| <b>PCDHB12</b>      | -0,663361589 | 4,960635587 | 0,000615671 | 0,046339591 |
| <b>DAO</b>          | -0,548166951 | 1,346196648 | 0,000651163 | 0,047748368 |
| <b>RPL7A</b>        | 0,691811606  | 7,410522823 | 0,000653998 | 0,047844197 |
| <b>PTDSS1</b>       | 0,509925166  | 3,160915036 | 0,000660891 | 0,048011949 |
| <b>RPS5</b>         | 0,710264729  | 6,135151094 | 0,000677285 | 0,048527422 |
| <b>DPP7</b>         | 0,549221829  | 3,521087728 | 0,000678995 | 0,048538844 |
| <b>RPLP0P6</b>      | 0,611499239  | 3,199592378 | 0,000687865 | 0,049060947 |

**Supplementary Table 2. Survival analysis for genes reported as prognostic indicators in Group 3 MB**

| <u>Author</u>         | <u>Gene</u>    | <u>Expression</u> | <u>HR PFS</u> | <u>P value</u> | <u>HR OS</u> | <u>P value</u> |
|-----------------------|----------------|-------------------|---------------|----------------|--------------|----------------|
| Remke et al. (26)     | <i>FSTL5</i>   | Upregulated       | 0.34          | 0.55           | 0.18         | 0.67           |
| Thompson et al. (33)  | <i>VEGFA</i>   | Upregulated       | 2.44          | 0.12           | 2.23         | 0.18           |
| das Chagas et al. (8) | <i>ITPRI</i>   | Downregulated     | 1.47          | 0.22           | 3.31         | 0.07           |
| das Chagas et al. (8) | <i>RGL1</i>    | Downregulated     | 3.06          | 0.08           | <b>5.72</b>  | <b>0.02</b>    |
| das Chagas et al. (8) | <i>ANTXR1</i>  | Downregulated     | 0.73          | 0.39           | 0.01         | 0.99           |
| Qin et al. (24)       | <i>APIS2</i>   | Upregulated       | 1.97          | 0.15           | 1.71         | 0.39           |
| Qin et al. (24)       | <i>GRM8</i>    | Upregulated       | 0.67          | 0.41           | 0.93         | 0.33           |
| Mutlu et al. (19)     | <i>MALAT1</i>  | Upregulated       | 0.31          | 0.58           | 0.97         | 0.32           |
| Mutlu et al. (19)     | <i>SNHG16*</i> | Upregulated       | <b>8.98</b>   | <b>0.01</b>    | <b>13.22</b> | <b>0.01</b>    |
| Riemony et al. (27)   | <i>IMPG2</i>   | Upregulated       | 0.76          | 0.38           | 0.25         | 0.61           |
| Delaidelli et al. (9) | <i>TPD52</i>   | Upregulated       | 1.73          | 0.19           | <b>3.57</b>  | <b>0.03</b>    |
| Luo et al. (18)       | <i>ZNF124</i>  | Upregulated       | 0.61          | 0.43           | 0.22         | 0.74           |

**\*Included in the current DEG gene list (see Suppl. Table 1)**

**Supplementary Table 3. Correlation between expression MYC and other prognostically significant genes**

| <b>Genes correlation</b> | <b>Correlation coefficient</b> | <b>P value</b>   |
|--------------------------|--------------------------------|------------------|
| <i>MYC vs. KIRREL2</i>   | <b>0.074</b>                   | <b>0.37</b>      |
| <i>MYC vs. ITPRIPL1</i>  | <b>0.388</b>                   | <b>&lt; 0.01</b> |
| <i>MYC vs. DCAF4</i>     | <b>0.615</b>                   | <b>&lt; 0.01</b> |
| <i>MYC vs. NPW</i>       | <b>0.649</b>                   | <b>&lt; 0.01</b> |
| <i>MYC vs. CDT1</i>      | <b>0.371</b>                   | <b>&lt; 0.01</b> |
| <i>MYC vs. MAB21L2</i>   | <b>0.555</b>                   | <b>&lt; 0.01</b> |



**Supplementary Table 4. Genes correlated with *KIRREL2* in Group 3 medulloblastoma**

| <b>Gene</b>    | <b>Correlation coefficient</b> | <b>P value</b> | <b>Location</b> |
|----------------|--------------------------------|----------------|-----------------|
| <i>NPHS1</i>   | 0.657314167383812              | < 0.01         | 19q13.12        |
| <i>GSG1</i>    | 0.654477717945629              | < 0.01         | 12p13.1         |
| <i>CABP2</i>   | 0.636438048630248              | < 0.01         | 11q13.2         |
| <i>SORCS2</i>  | 0.607556202839938              | < 0.01         | 4p16.1          |
| <i>FAM57B</i>  | 0.551225762800319              | < 0.01         | 16p11.2         |
| <i>TMCC2</i>   | 0.566931501428839              | < 0.01         | 1q32.1          |
| <i>CKMT1A</i>  | 0.563888703781324              | < 0.01         | 15q15.3         |
| <i>HEBP1</i>   | 0.560451771049214              | < 0.01         | 12p13.1         |
| <i>CCDC85C</i> | 0.556861199000481              | < 0.01         | 14q32.2         |
| <i>NTN3</i>    | 0.554624513450379              | < 0.01         | 16p13.3         |
| <i>NBEAL2</i>  | 0.55010124858805               | < 0.01         | 3p21.31         |
| <i>EML4</i>    | 0.542463504423775              | < 0.01         | 2p21            |
| <i>SHROOM2</i> | 0.541922701283555              | < 0.01         | Xp22.2          |
| <i>CLN6</i>    | 0.542808399036347              | < 0.01         | 15q23           |
| <i>RPUSD3</i>  | 0.53414495964933               | < 0.01         | 3p25.3          |
| <i>EEF2K</i>   | 0.510876975978882              | < 0.01         | 16p12.2         |
| <i>PDIA5</i>   | 0.530708006789616              | < 0.01         | 3q21.1          |
| <i>GPD1L</i>   | 0.530729358039451              | < 0.01         | 3p22.3          |
| <i>PALMD</i>   | 0.528565433173668              | < 0.01         | 1p21.2          |
| <i>CD320</i>   | 0.527359346194482              | < 0.01         | 19q13.2         |
| <i>SCLY</i>    | 0.520445168954163              | < 0.01         | 2q37.3          |
| <i>CDK5R2</i>  | 0.516250239724747              | < 0.01         | 2q35            |
| <i>ARMC6</i>   | 0.511853551325067              | < 0.01         | 19p13.11        |
| <i>SARS2</i>   | 0.512101910833845              | < 0.01         | 19q13.2         |
| <i>PSAPL1</i>  | 0.509223751907429              | < 0.01         | 4p16.1          |
| <i>RPP25</i>   | 0.507148003716843              | < 0.01         | 15q24.2         |
| <i>FEZF2</i>   | 0.507238392393008              | < 0.01         | 3p14.2          |
| <i>QTRTD1</i>  | 0.501592211601122              | < 0.01         | 3q13.31         |
| <i>CERS4</i>   | 0.500676445636955              | < 0.01         | 19p13.2         |
| <i>ANKDD1A</i> | 0.476540509361738              | < 0.01         | 15q22.31        |
| <i>PNO1</i>    | 0.476066429623778              | < 0.01         | 2p14            |
| <i>CRYBG3</i>  | 0.498236522538543              | < 0.01         | 3q11.2          |
| <i>TULP1</i>   | 0.497931608818322              | < 0.01         | 6p21.31         |
| <i>LHX3</i>    | 0.492349431084144              | < 0.01         | 9q34.3          |
| <i>C2ORF71</i> | 0.490777755062613              | < 0.01         | 2p23.3          |
| <i>MATK</i>    | 0.490268403977136              | < 0.01         | 19p13.3         |
| <i>GALT</i>    | 0.488246383743145              | < 0.01         | 9p13.3          |
| <i>ISOC1</i>   | 0.488260791409927              | < 0.01         | 5q23.3          |
| <i>CACNA1B</i> | 0.484770833607915              | < 0.01         | 9q34.3          |
| <i>KLF16</i>   | 0.483712130914893              | < 0.01         | 19p13.3         |
| <i>RCOR1</i>   | 0.481374181030577              | < 0.01         | 14q32.31        |
| <i>RD3</i>     | 0.479626446494979              | < 0.01         | 1q32.1          |
| <i>TBC1D8</i>  | 0.477878598852958              | < 0.01         | 2q11.2          |
| <i>NCLN</i>    | 0.475413368247615              | < 0.01         | 19p13.3         |
| <i>TIMM50</i>  | 0.474929999490694              | < 0.01         | 19q13.2         |
| <i>PNPLA3</i>  | 0.474942085756096              | < 0.01         | 22q13.2         |
| <i>DUSP7</i>   | 0.473936653091882              | < 0.01         | 3p21.31         |
| <i>LRP5L</i>   | 0.469291197140299              | < 0.01         | 22q11.23        |
| <i>MRPS25</i>  | 0.467485932716633              | < 0.01         | 3p25.1          |
| <i>NAGPA</i>   | 0.465777958360065              | < 0.01         | 16p13.3         |
| <i>RIMBP2</i>  | 0.462278342832807              | < 0.01         | 12q24.33        |
| <i>RHBDL3</i>  | 0.462572656384838              | < 0.01         | 17q11.2         |
| <i>KLHL15</i>  | 0.462327966762969              | < 0.01         | Xp22.11         |
| <i>PPMIN</i>   | 0.460537468910319              | < 0.01         | 19q13.32        |
| <i>QSOX2</i>   | 0.458926674743014              | < 0.01         | 9q34.3          |
| <i>ABCG4</i>   | 0.45840156913308               | < 0.01         | 11q23.3         |
| <i>CYP27B1</i> | 0.457130915172943              | < 0.01         | 12q14.1         |
| <i>TTC7B</i>   | 0.457158909996273              | < 0.01         | 14q32.11        |
| <i>MRPS9</i>   | 0.456543390436614              | < 0.01         | 2q12.1          |
| <i>TMEM201</i> | 0.455431904331122              | < 0.01         | 1p36.22         |

**Supplementary Table 5. Signaling pathways associated with *KIRREL2*-correlated genes**

| <b>Pathways (Gene Ontology)</b> | <b>Go Path</b> | <b>Associated Genes Found</b>                                                         |
|---------------------------------|----------------|---------------------------------------------------------------------------------------|
| Ligase activity                 | 16874; 16875   | <i>WARS2, FARS2, LARS2, RIMKLA, SARS2, QARS, XRCC1, TRIM25, MARS2</i>                 |
| tRNA metabolic process          | 6399; 6418     | <i>RPUSD3, CDK5RAP1, RPP25, SARS2, QARS, QTRTD1, GTPBP3, RPUSD4</i>                   |
| Mitochondrial translation       | 32543; 44429   | <i>MRPL10, LARS2, MRPL4, CDK5RAP1, MRPS25, MRPS9, DAP3</i>                            |
| Cellular protein complex        | 32984; 43624   | <i>KIF19, MRPL10, RLTPR, MRPL4, MRPS25, MRPS9, DAP3</i>                               |
| Translation elongation          | 6412; 6414     | <i>FARS2, EIF2D, EEF2K, LARS2, TACO1, SARS2, QARS, DAP3, MARS2, MRPS9</i>             |
| Neurogenesis                    | 22008; 48699   | <i>CSMD3, CRX, LPPR5, EML1, INPP5J, DISC1, EEF2K, HDAC1, TLX2, C2ORF71</i>            |
| Synapse part; presynapse        | 44456; 98973   | <i>RAB40B, KPTN, DISC1, EEF2K, ASIC2, ROR1, PALMD, PVRL1, RAB3A, STX3, SYP, TULP1</i> |

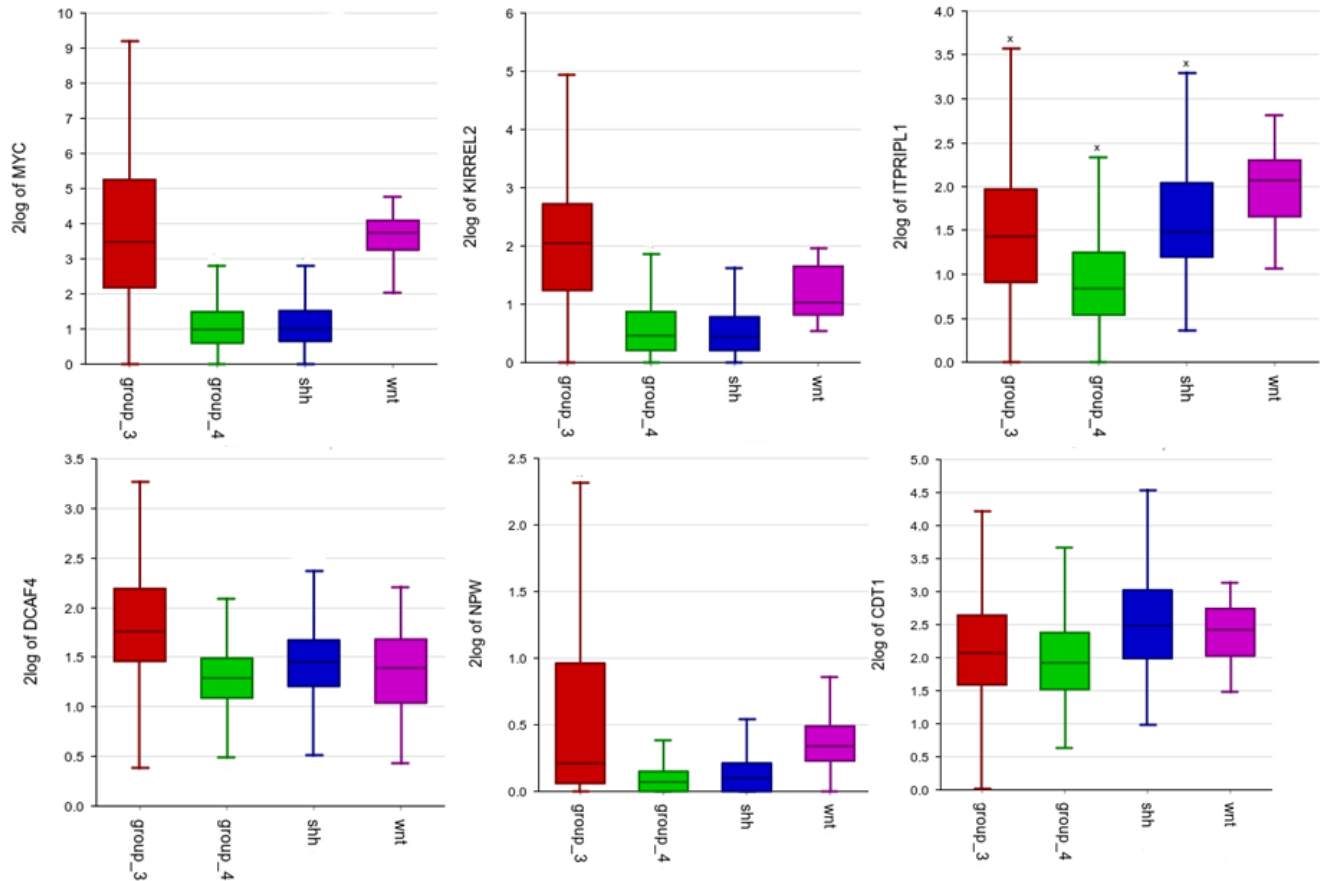

**Supplementary Figure 3.** Expression levels of top 6 prognostically relevant genes in four molecular MB groups. Expression of *KIRREL2* is significantly higher in Grp 3 MB (red box plots) as compared to Grp 4 MB (green boxplots), SHH-MB (blue boxplots) and WNT (violet boxplots). Five other genes (*MYC*, *ITPRIPL1*, *DCAF4*, *NPW*, *CDT1*) disclosed less significant differences between these canonical MB molecular groups.

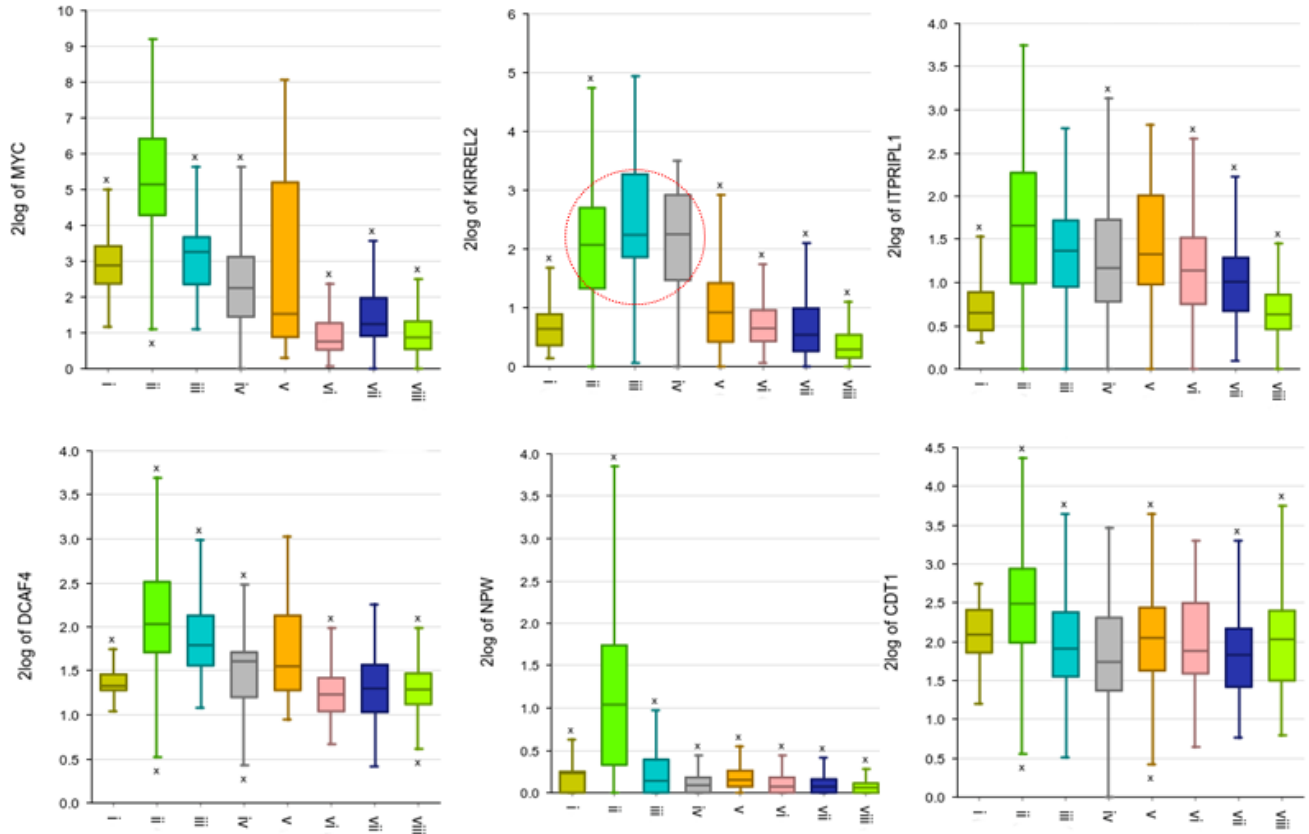

**Supplementary Figure 4.** Expression levels of top prognostically relevant genes in eight second generation MB subgroups. *KIRREL2* expression is quite similar in main Grp 3 MB “second generation” II, III and IV subgroups which composed 85% of Grp 3 MB in the current series. Five other genes (*MYC*, *ITPRIPL1*, *DCAF4*, *NPW*, *CDT1*) disclosed higher expression levels for second generation subgroup II mostly.

**Supplementary Table 6. Methylation levels of CpGs within *KIRREL2* promoter region.**

| CpG               | CpG_Loci                       | Targ_Vals          | Other_Vals         | Meth_Var            | Intercept          | F                  | P_val              | q_val              |
|-------------------|--------------------------------|--------------------|--------------------|---------------------|--------------------|--------------------|--------------------|--------------------|
| <b>cg15509065</b> | <b>chr19:36346314-36346315</b> | <b>0,298485906</b> | <b>0,417788437</b> | <b>-0,119302531</b> | <b>0,417788437</b> | <b>20,67923065</b> | <b>1,03E-05</b>    | <b>0,001486624</b> |
| cg22339278        | chr19:36347276-36347277        | 0,068848688        | 0,075244311        | -0,006395623        | 0,075244311        | 3,960102938        | 0,048194013        | 0,146734342        |
| <b>cg21057435</b> | <b>chr19:36347443-36347444</b> | <b>0,08760081</b>  | <b>0,122478427</b> | <b>-0,034877617</b> | <b>0,122478427</b> | <b>11,97195017</b> | <b>0,000682828</b> | <b>0,011899206</b> |
| cg20254353        | chr19:36347626-36347627        | 0,05794818         | 0,068181194        | -0,010233013        | 0,068181194        | 2,142610778        | 0,145104518        | 0,271018526        |
| cg17975002        | chr19:36347691-36347692        | 0,047554572        | 0,049376683        | -0,001822112        | 0,049376683        | 0,036335545        | 0,849051669        | 0,61290794         |
| cg25921512        | chr19:36347698-36347699        | 0,015388262        | 0,020707048        | -0,005318786        | 0,020707048        | 0,568690323        | 0,451823101        | 0,473457806        |
| cg00519185        | chr19:36347907-36347908        | 0,114594234        | 0,134817461        | -0,020223227        | 0,134817461        | 5,704006729        | 0,018022403        | 0,082140507        |
| cg09479015        | chr19:36347919-36347920        | 0,089165846        | 0,1066112          | -0,017445354        | 0,1066112          | 4,358352274        | 0,038318927        | 0,128548673        |
| cg06945936        | chr19:36348034-36348035        | 0,029522608        | 0,043697478        | -0,01417487         | 0,043697478        | 2,981284224        | 0,086048985        | 0,203940335        |
| <b>cg23087300</b> | <b>chr19:36348415-36348416</b> | <b>0,249754384</b> | <b>0,42432827</b>  | <b>-0,174573886</b> | <b>0,42432827</b>  | <b>46,50492802</b> | <b>1,53E-10</b>    | <b>1,12E-05</b>    |
| cg05657800        | chr19:36350479-36350480        | 0,69834912         | 0,718539811        | -0,02019069         | 0,718539811        | 1,864033232        | 0,173963981        | 0,297977727        |
| cg08141172        | chr19:36351774-36351775        | 0,835946855        | 0,850453594        | -0,014506739        | 0,850453594        | 0,734309187        | 0,392696322        | 0,444402284        |
| cg12183993        | chr19:36352005-36352006        | 0,72936527         | 0,72714277         | 0,0022225           | 0,72714277         | 0,010601704        | 0,918112446        | 0,630357632        |
| cg10786645        | chr19:36352376-36352377        | 0,755970071        | 0,713781148        | 0,042188923         | 0,713781148        | 2,036063279        | 0,155440814        | 0,28113189         |
| cg01588826        | chr19:36352459-36352460        | 0,785254616        | 0,762762836        | 0,02249178          | 0,762762836        | 2,986299356        | 0,085787715        | 0,203600242        |
| cg27035708        | chr19:36357115-36357116        | 0,785143958        | 0,775991           | 0,009152958         | 0,775991           | 0,645542662        | 0,422832794        | 0,459560158        |
| cg22467594        | chr19:36357700-36357701        | 0,835865283        | 0,817243509        | 0,018621774         | 0,817243509        | 3,002378711        | 0,084955586        | 0,202489736        |

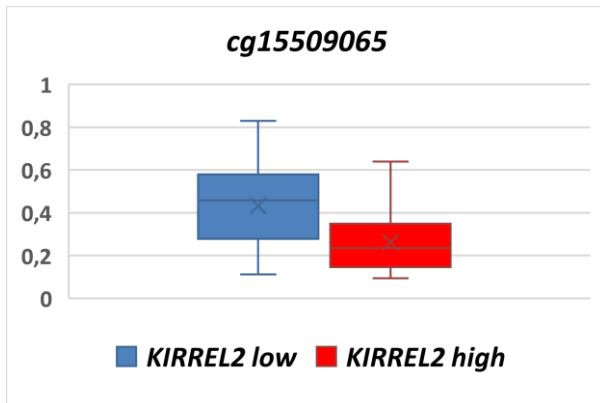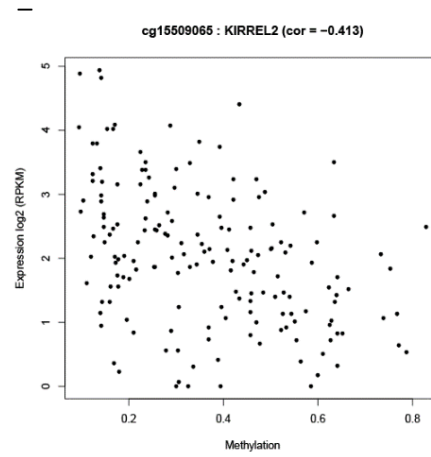

**a.**

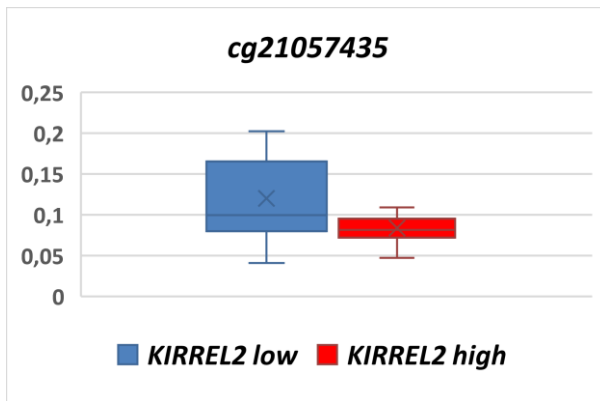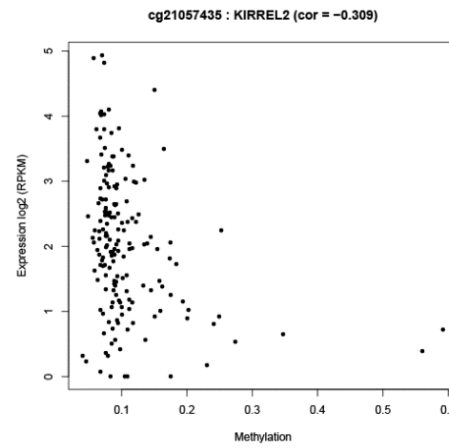

**b.**

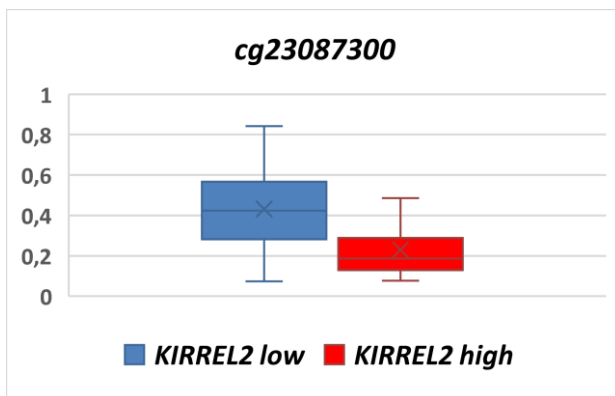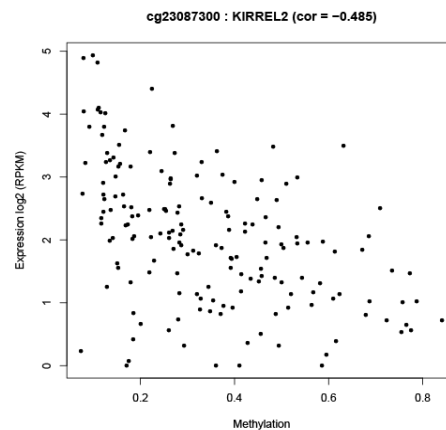

**c.**

**Supplementary Figure 5.** Methylation levels of three CpGs (cg15509065 (a), cg21057435 (b), cg23087300 (c)) within *KIRREL2* promoter region were lower in Grp 3 MB with higher gene expression and, also, negative correlations were identified between epigenetic and transcriptome data (correlation coefficients  $r = -0.413$ ;  $-0.309$ ; and  $-0.485$ , respectively; all  $p < 0.01$ ).

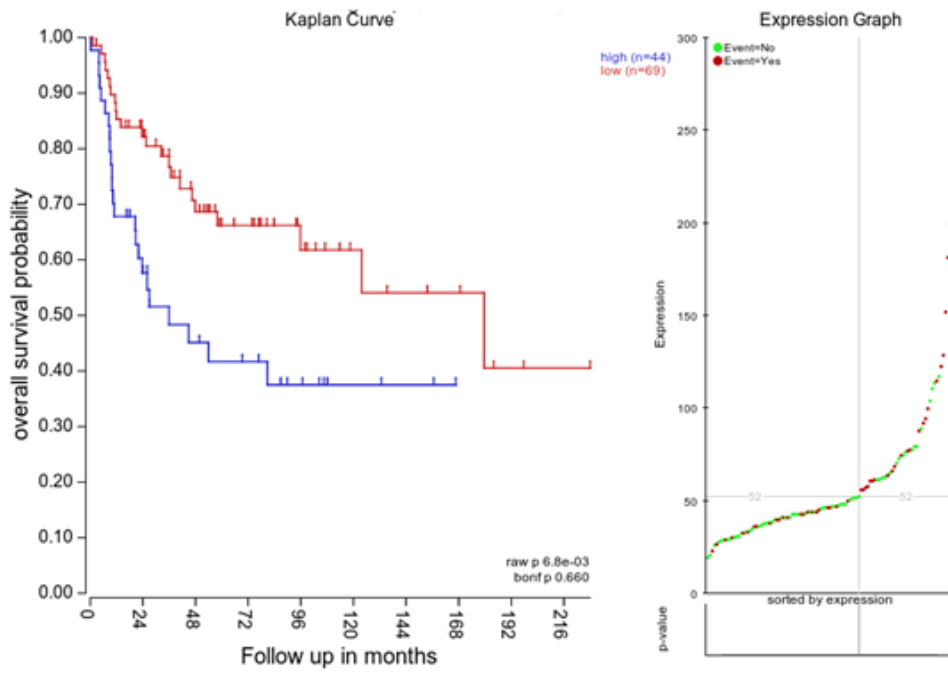

**a.**

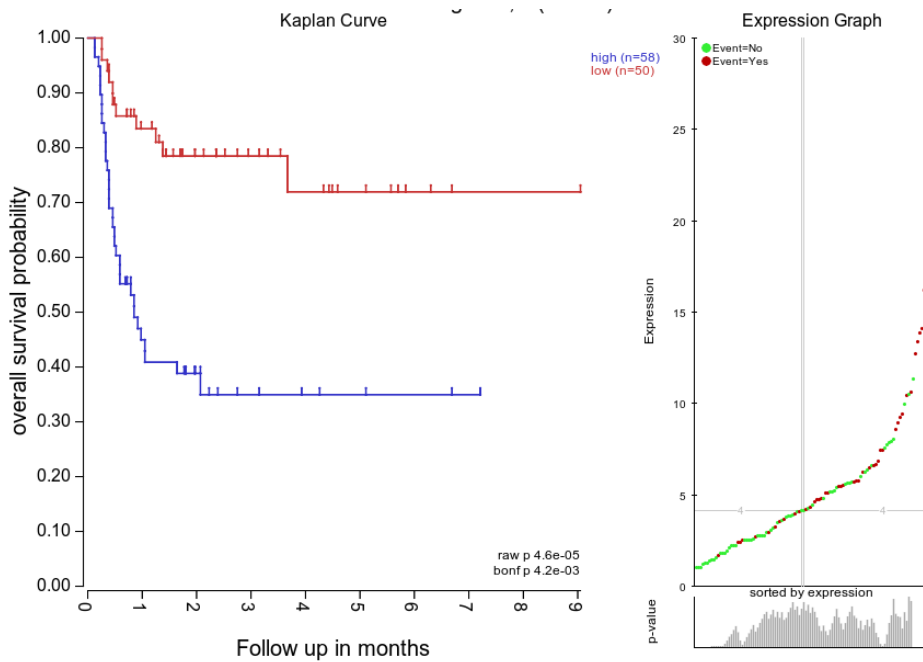

**b.**

**Supplementary Figure 6.** Survival analysis of Affymetrix gene expression profiling data generated for two independent sets of Grp 3 MB (**a.** Cavalli et al [3]; n = 113; log-rank;  $p < 0.01$ ) and (**b.** Kool et al [15]; n = 108; log rank;  $p < 0.01$ ) showed unfavourable overall survival for Grp 3 MB with high levels of *KIRREL2* expression (blue lines).
